# Supplementary material for: Knowledge granularity–based ecological safety evaluation method for plateau-characteristic agribusinesses
Source: Research Square preprint supplement (doi:10.21203/rs.3.rs-6618064/v1), 2025-06-03
Supplement: Supplementary file 1 [file a9d82683833ac1acd36a9ecb.docx]

Appendix A The tables referred to in section 4.2.1

**Table A.1.** Information on the evaluation of knowledge structure *ks*1 by expert *e*1

| BD functions | Weights | Probabilities assigned on the subsets of | | | | | | | | | |
| --- | --- | --- | --- | --- | --- | --- | --- | --- | --- | --- | --- |
|  |  |  |  |  |  |  |  |  |  |
|  | **0.15** | 0.4 | 0.3 | 0 | 0 | 0.3 | 0 | 0 | 0.1 | 0 | 0 |
|  | **0.15** | 0 | 0.2 | 0.25 | 0 | 0 | 0.4 | 0 | 0.15 | 0 | 0 |
|  | **0.15** | 0 | 0.1 | 0.4 | 0.3 | 0 | 0 | 0 | 0 | 0.3 | 0 |
|  | **0.15** | 0 | 0.1 | 0.3 | 0.15 | 0 | 0.1 | 0.2 | 0 | 0.15 | 0 |
|  | **0.2** | 0 | 0.1 | 0.3 | 0.2 | 0 | 0 | 0.1 | 0 | 0.3 | 0 |
|  | **0.2** | 0.15 | 0.2 | 0.3 | 0 | 0.1 | 0.1 | 0 | 0 | 0.15 | 0 |
|  | **0.3** | 0.2 | 0.5 | 0 | 0 | 0.2 | 0 | 0 | 0.1 | 0 | 0 |
|  | **0.7** | 0.4 | 0.2 | 0 | 0 | 0.4 | 0 | 0 | 0 | 0 | 0 |
|  | **0.6** | 0 | 0.2 | 0.2 | 0 | 0 | 0.3 | 0.2 | 0 | 0.1 | 0 |
|  | **0.4** | 0 | 0 | 0 | 0 | 0.1 | 0.3 | 0.15 | 0.25 | 0.2 | 0 |
|  | **0.3** | 0 | 0.2 | 0.5 | 0 | 0 | 0.3 | 0 | 0 | 0 | 0 |
|  | **0.3** | 0 | 0 | 0.3 | 0.5 | 0 | 0 | 0 | 0 | 0.2 | 0 |
|  | **0.4** | 0.1 | 0.3 | 0.25 | 0 | 0 | 0.2 | 0 | 0.15 | 0 | 0 |
|  | **0.6** | 0 | 0.2 | 0.3 | 0 | 0 | 0.3 | 0 | 0.2 | 0 | 0 |
|  | **0.4** | 0 | 0 | 0.4 | 0.3 | 0 | 0 | 0 | 0 | 0.3 | 0 |
|  | **0.5** | 0 | 0.15 | 0.25 | 0.3 | 0 | 0 | 0 | 0 | 0.3 | 0 |
|  | **0.5** | 0 | 0.2 | 0.4 | 0.15 | 0 | 0 | 0 | 0 | 0.25 | 0 |
|  | **0.5** | 0 | 0.05 | 0.35 | 0.2 | 0 | 0.1 | 0.1 | 0 | 0.2 | 0 |
|  | **0.5** | 0.25 | 0.3 | 0.15 | 0 | 0.1 | 0 | 0 | 0.2 | 0 | 0 |
|  | **0.5** | 0 | 0.7 | 0.1 | 0 | 0 | 0.2 | 0 | 0 | 0 | 0 |
|  | **0.5** | 0.5 | 0.2 | 0 | 0 | 0.3 | 0 | 0 | 0 | 0 | 0 |
|  | **0.25** | 0.4 | 0.3 | 0 | 0 | 0.3 | 0 | 0 | 0 | 0 | 0 |
|  | **0.25** | 0.5 | 0.2 | 0 | 0 | 0.3 | 0 | 0 | 0 | 0 | 0 |
|  | **0.5** | 0.6 | 0.1 | 0 | 0 | 0.3 | 0 | 0 | 0 | 0 | 0 |
|  | **0.3** | 0 | 0 | 0 | 0 | 0.1 | 0.6 | 0 | 0.3 | 0 | 0 |
|  | **0.35** | 0 | 0.3 | 0.4 | 0 | 0 | 0.3 | 0 | 0 | 0 | 0 |
|  | **0.35** | 0 | 0 | 0.1 | 0.35 | 0 | 0 | 0.3 | 0 | 0.25 | 0 |
|  | **0.4** | 0 | 0 | 0 | 0 | 0.4 | 0.3 | 0 | 0.3 | 0 | 0 |
|  | **0.3** | 0 | 0 | 0 | 0 | 0 | 0.25 | 0.25 | 0.2 | 0.3 | 0 |
|  | **0.3** | 0 | 0 | 0 | 0 | 0 | 0.25 | 0.25 | 0.2 | 0.3 | 0 |
|  | **0.4** | 0 | 0 | 0.2 | 0.6 | 0 | 0 | 0.2 | 0 | 0 | 0 |
|  | **0.2** | 0 | 0 | 0 | 0 | 0.2 | 0.3 | 0 | 0.5 | 0 | 0 |
|  | **0.2** | 0 | 0.3 | 0.3 | 0 | 0 | 0.4 | 0 | 0 | 0 | 0 |
|  | **0.2** | 0.2 | 0.4 | 0 | 0 | 0.3 | 0 | 0 | 0.1 | 0 | 0 |
|  | **0.35** | 0 | 0 | 0.45 | 0.25 | 0 | 0 | 0 | 0 | 0 | 0 |
|  | **0.35** | 0 | 0 | 0 | 0.9 | 0 | 0.1 | 0 | 0 | 0 | 0 |
|  | **0.3** | 0 | 0 | 0.2 | 0.5 | 0 | 0 | 0.3 | 0 | 0 | 0 |
|  | **0.2** | 0 | 0.25 | 0.5 | 0 | 0 | 0.25 | 0 | 0 | 0 | 0 |
|  | **0.2** | 0 | 0 | 0 | 0 | 0.2 | 0.5 | 0 | 0.3 | 0 | 0 |
|  | **0.4** | 0 | 0.5 | 0.2 | 0 | 0 | 0.3 | 0 | 0 | 0 | 0 |
|  | **0.35** | 0 | 0.25 | 0.35 | 0 | 0 | 0.4 | 0 | 0 | 0 | 0 |
|  | **0.4** | 0 | 0.4 | 0.4 | 0 | 0 | 0.2 | 0 | 0 | 0 | 0 |
|  | **0.25** | 0 | 0 | 0 | 0 | 0 | 0 | 0 | 0 | 0 | 1 |
|  | **0.35** | 0 | 0 | 0.8 | 0.2 | 0 | 0 | 0 | 0 | 0 | 0 |
|  | **0.35** | 0 | 0 | 0.1 | 0.7 | 0 | 0 | 0.2 | 0 | 0 | 0 |
|  | **0.3** | 0 | 0.5 | 0.2 | 0 | 0 | 0.3 | 0 | 0 | 0 | 0 |
|  | **0.3** | 0 | 0 | 0.5 | 0.5 | 0 | 0 | 0 | 0 | 0 | 0 |
|  | **0.3** | 0 | 0 | 0.3 | 0.3 | 0 | 0 | 0.4 | 0 | 0 | 0 |
|  | **0.2** | 0.2 | 0.5 | 0 | 0 | 0.3 | 0 | 0 | 0 | 0 | 0 |
|  | **0.2** | 0 | 0 | 0 | 0 | 0 | 0 | 0 | 0 | 0 | 1 |
|  | **0.3** | 0 | 0 | 0.7 | 0.1 | 0 | 0 | 0.2 | 0 | 0 | 0 |
|  | **0.3** | 0.2 | 0.6 | 0.2 | 0 | 0 | 0 | 0 | 0 | 0 | 0 |
|  | **0.4** | 0 | 0 | 0.4 | 0.3 | 0 | 0 | 0.3 | 0 | 0 | 0 |
|  | **0.2** | 0 | 0.1 | 0.5 | 0.1 | 0 | 0.1 | 0.2 | 0 | 0 | 0 |
|  | **0.2** | 0 | 0 | 0 | 0 | 0 | 0.2 | 0.3 | 0 | 0.5 | 0 |
|  | **0.4** | 0 | 0 | 0.3 | 0.7 | 0 | 0 | 0 | 0 | 0 | 0 |
|  | **0.2** | 0.1 | 0.2 | 0.1 | 0 | 0.2 | 0.2 | 0 | 0.2 | 0 | 0 |
|  | **0.35** | 0.3 | 0.3 | 0 | 0 | 0.4 | 0 | 0 | 0 | 0 | 0 |
|  | **0.3** | 0 | 0.2 | 0.5 | 0 | 0 | 0.3 | 0 | 0 | 0 | 0 |
|  | **0.35** | 0.4 | 0.3 | 0 | 0 | 0.3 | 0 | 0 | 0 | 0 | 0 |

**Table A.2.** Information on the evaluation of knowledge structure *ks*1 by expert *e*2

| BD functions | Weights | Probabilities assigned on the subsets of | | | | | | | | | |
| --- | --- | --- | --- | --- | --- | --- | --- | --- | --- | --- | --- |
|  |  |  |  |  |  |  |  |  |  |
|  | **0.15** | 0.4 | 0.3 | 0 | 0 | 0.3 | 0 | 0 | 0.1 | 0 | 0 |
|  | **0.15** | 0 | 0.2 | 0.3 | 0 | 0 | 0.5 | 0 | 0 | 0 | 0 |
|  | **0.15** | 0 | 0.1 | 0.3 | 0.4 | 0 | 0 | 0 | 0 | 0.2 | 0 |
|  | **0.15** | 0 | 0.3 | 0.3 | 0.1 | 0 | 0.3 | 0 | 0 | 0 | 0 |
|  | **0.2** | 0 | 0.1 | 0.3 | 0.1 | 0 | 0 | 0.2 | 0 | 0.3 | 0 |
|  | **0.2** | 0.2 | 0.2 | 0.1 | 0 | 0 | 0 | 0 | 0.5 | 0 | 0 |
|  | **0.3** | 0.2 | 0.4 | 0.1 | 0 | 0 | 0 | 0 | 0.3 | 0 | 0 |
|  | **0.7** | 0.4 | 0.2 | 0 | 0 | 0.4 | 0 | 0 | 0 | 0 | 0 |
|  | **0.6** | 0 | 0.2 | 0.2 | 0 | 0 | 0.3 | 0.2 | 0 | 0.1 | 0 |
|  | **0.4** | 0 | 0 | 0 | 0 | 0.1 | 0.3 | 0.15 | 0.25 | 0.2 | 0 |
|  | **0.3** | 0 | 0 | 0.2 | 0.8 | 0 | 0 | 0 | 0 | 0 | 0 |
|  | **0.3** | 0 | 0 | 0.3 | 0.6 | 0 | 0 | 0.1 | 0 | 0 | 0 |
|  | **0.4** | 0 | 0.5 | 0.5 | 0 | 0 | 0 | 0 | 0 | 0 | 0 |
|  | **0.6** | 0.1 | 0.3 | 0.4 | 0 | 0 | 0 | 0 | 0.2 | 0 | 0 |
|  | **0.4** | 0 | 0 | 0.6 | 0.4 | 0 | 0 | 0 | 0 | 0 | 0 |
|  | **0.5** | 0 | 0.1 | 0.4 | 0.4 | 0 | 0 | 0 | 0 | 0.1 | 0 |
|  | **0.5** | 0 | 0.2 | 0.4 | 0.2 | 0 | 0 | 0 | 0 | 0.2 | 0 |
|  | **0.5** | 0 | 0 | 0.5 | 0.4 | 0 | 0 | 0 | 0 | 0.1 | 0 |
|  | **0.5** | 0.3 | 0.3 | 0.1 | 0 | 0 | 0 | 0 | 0.3 | 0 | 0 |
|  | **0.5** | 0 | 0 | 0.3 | 0 | 0.7 | 0 | 0 | 0 | 0 | 0 |
|  | **0.5** | 0.3 | 0.5 | 0.2 | 0 | 0 | 0 | 0 | 0 | 0 | 0 |
|  | **0.25** | 0.3 | 0.4 | 0.1 | 0 | 0 | 0 | 0 | 0.2 | 0 | 0 |
|  | **0.25** | 0.5 | 0.3 | 0 | 0 | 0.2 | 0 | 0 | 0 | 0 | 0 |
|  | **0.5** | 0.8 | 0.2 | 0 | 0 | 0 | 0 | 0 | 0 | 0 | 0 |
|  | **0.3** | 0 | 0.3 | 0.2 | 0 | 0 | 0.5 | 0 | 0 | 0 | 0 |
|  | **0.35** | 0 | 0.2 | 0.4 | 0.1 | 0 | 0 | 0 | 0 | 0.3 | 0 |
|  | **0.35** | 0 | 0 | 0.3 | 0.7 | 0 | 0 | 0 | 0 | 0 | 0 |
|  | **0.4** | 0 | 0 | 0 | 0 | 0.4 | 0.3 | 0 | 0.3 | 0 | 0 |
|  | **0.3** | 0 | 0.2 | 0.4 | 0 | 0 | 0 | 0 | 0.4 | 0 | 0 |
|  | **0.3** | 0 | 0.2 | 0.4 | 0 | 0 | 0 | 0 | 0.4 | 0 | 0 |
|  | **0.4** | 0 | 0 | 0.2 | 0.6 | 0 | 0 | 0.2 | 0 | 0 | 0 |
|  | **0.2** | 0 | 0.2 | 0.4 | 0 | 0 | 0 | 0 | 0.4 | 0 | 0 |
|  | **0.2** | 0 | 0.3 | 0.3 | 0 | 0 | 0.4 | 0 | 0 | 0 | 0 |
|  | **0.2** | 0.1 | 0.4 | 0.1 | 0 | 0 | 0 | 0 | 0.4 | 0 | 0 |
|  | **0.35** | 0 | 0.3 | 0.4 | 0 | 0 | 0 | 0.3 | 0 | 0 | 0 |
|  | **0.35** | 0 | 0 | 0 | 0.85 | 0 | 0 | 0.15 | 0 | 0 | 0 |
|  | **0.3** | 0 | 0 | 0.4 | 0.5 | 0 | 0 | 0.1 | 0 | 0 | 0 |
|  | **0.2** | 0 | 0 | 0.5 | 0.2 | 0 | 0.3 | 0 | 0 | 0 | 0 |
|  | **0.2** | 0 | 0 | 0 | 0 | 0 | 0 | 0 | 0 | 0 | 1 |
|  | **0.4** | 0 | 0.4 | 0.3 | 0 | 0 | 0.3 | 0 | 0 | 0 | 0 |
|  | **0.35** | 0 | 0.2 | 0.4 | 0 | 0 | 0.4 | 0 | 0 | 0 | 0 |
|  | **0.4** | 0 | 0.4 | 0.4 | 0 | 0 | 0.2 | 0 | 0 | 0 | 0 |
|  | **0.25** | 0 | 0.2 | 0.3 | 0 | 0 | 0.5 | 0 | 0 | 0 | 0 |
|  | **0.35** | 0 | 0 | 0.8 | 0.2 | 0 | 0 | 0 | 0 | 0 | 0 |
|  | **0.35** | 0 | 0 | 0.4 | 0.6 | 0 | 0 | 0 | 0 | 0 | 0 |
|  | **0.3** | 0.2 | 0.5 | 0.2 | 0 | 0 | 0 | 0 | 0.1 | 0 | 0 |
|  | **0.3** | 0 | 0 | 0.5 | 0.5 | 0 | 0 | 0 | 0 | 0 | 0 |
|  | **0.3** | 0 | 0 | 0.3 | 0.3 | 0 | 0 | 0.4 | 0 | 0 | 0 |
|  | **0.2** | 0 | 0.2 | 0.5 | 0.2 | 0 | 0 | 0 | 0 | 0 | 0 |
|  | **0.2** | 0 | 0 | 0.5 | 0.5 | 0 | 0 | 0 | 0 | 0 | 0 |
|  | **0.3** | 0 | 0.1 | 0.6 | 0.1 | 0 | 0 | 0.2 | 0 | 0 | 0 |
|  | **0.3** | 0 | 0.2 | 0.4 | 0.4 | 0 | 0 | 0 | 0 | 0 | 0 |
|  | **0.4** | 0 | 0 | 0.4 | 0.3 | 0 | 0 | 0.3 | 0 | 0 | 0 |
|  | **0.2** | 0 | 0.2 | 0.5 | 0.2 | 0 | 0 | 0 | 0 | 0.1 | 0 |
|  | **0.2** | 0 | 0.2 | 0.3 | 0.2 | 0 | 0.3 | 0 | 0 | 0 | 0 |
|  | **0.4** | 0 | 0 | 0.3 | 0.7 | 0 | 0 | 0 | 0 | 0 | 0 |
|  | **0.2** | 0.1 | 0.2 | 0.1 | 0 | 0 | 0 | 0 | 0.6 | 0 | 0 |
|  | **0.35** | 0.3 | 0.3 | 0 | 0 | 0.4 | 0 | 0 | 0 | 0 | 0 |
|  | **0.3** | 0.2 | 0.2 | 0.5 | 0 | 0 | 0.1 | 0 | 0 | 0 | 0 |
|  | **0.35** | 0.4 | 0.3 | 0 | 0 | 0.3 | 0 | 0 | 0 | 0 | 0 |

**Table A.3.** Information on the evaluation of knowledge structure *ks*2 by expert *e*3

| BD functions | Weights | Probabilities assigned on the subsets of | | | | | | | | | |
| --- | --- | --- | --- | --- | --- | --- | --- | --- | --- | --- | --- |
|  |  |  |  |  |  |  |  |  |  |
|  | **0.2** | 0 | 0 | 0.5 | 0 | 0 | 0.3 | 0.2 | 0 | 0 | 0 |
|  | **0.35** | 0 | 0 | 0 | 0 | 0 | 0 | 0 | 0.6 | 0.2 | 0.2 |
|  | **0.2** | 0 | 0 | 0 | 0.6 | 0 | 0.1 | 0 | 0 | 0.3 | 0 |
|  | **0.25** | 0 | 0 | 0.3 | 0.6 | 0.1 | 0 | 0 | 0 | 0 | 0 |
|  | **0.35** | 0 | 0 | 0 | 0.8 | 0 | 0 | 0.2 | 0 | 0 | 0 |
|  | **0.3** | 0 | 0.3 | 0.6 | 0 | 0 | 0 | 0.1 | 0 | 0 | 0 |
|  | **0.35** | 0 | 0.4 | 0.2 | 0 | 0 | 0.2 | 0.2 | 0 | 0 | 0 |
|  | **0.1** | 0 | 0.5 | 0.4 | 0 | 0.1 | 0 | 0 | 0 | 0 | 0 |
|  | **0.3** | 0 | 0 | 0 | 0 | 0 | 0 | 0 | 0 | 0.8 | 0.2 |
|  | **0.3** | 0 | 0.2 | 0.5 | 0 | 0 | 0 | 0.3 | 0 | 0 | 0 |
|  | **0.3** | 0 | 0 | 0 | 0.6 | 0 | 0.2 | 0.2 | 0 | 0 | 0 |
|  | **0.4** | 0 | 0 | 0 | 0 | 0 | 0 | 0 | 0.4 | 0.3 | 0.3 |
|  | **0.6** | 0 | 0 | 0 | 0.7 | 0 | 0.15 | 0 | 0 | 0.15 | 0 |
|  | **0.25** | 0 | 0 | 0.1 | 0 | 0.1 | 0.8 | 0 | 0 | 0 | 0 |
|  | **0.4** | 0 | 0 | 0.5 | 0.5 | 0 | 0 | 0 | 0 | 0 | 0 |
|  | **0.35** | 0 | 0.5 | 0.2 | 0 | 0.1 | 0.2 | 0 | 0 | 0 | 0 |
|  | **0.25** | 0 | 0 | 0 | 0 | 0.9 | 0 | 0 | 0.1 | 0 | 0 |
|  | **0.25** | 0 | 0 | 0 | 0.15 | 0.75 | 0 | 0 | 0.1 | 0 | 0 |
|  | **0.3** | 0 | 0 | 0 | 0 | 0 | 0 | 0 | 0.5 | 0.5 | 0 |
|  | **0.2** | 0 | 0 | 0.2 | 0.1 | 0.7 | 0 | 0 | 0 | 0 | 0 |
|  | **0.2** | 0 | 0 | 0 | 0 | 0 | 0 | 0 | 0 | 0 | 1 |
|  | **0.2** | 0 | 0 | 0.45 | 0 | 0 | 0 | 0.45 | 0.1 | 0 | 0 |
|  | **0.3** | 0 | 0.2 | 0.4 | 0.2 | 0 | 0 | 0.2 | 0 | 0 | 0 |
|  | **0.3** | 0 | 0 | 0 | 0 | 0.7 | 0 | 0.3 | 0 | 0 | 0 |
|  | **0.4** | 0 | 0.8 | 0.1 | 0 | 0 | 0 | 0 | 0 | 0.1 | 0 |
|  | **0.3** | 0 | 0.9 | 0 | 0 | 0 | 0 | 0 | 0 | 0.1 | 0 |
|  | **0.3** | 0 | 0.75 | 0.1 | 0 | 0 | 0 | 0 | 0 | 0.15 | 0 |
|  | **0.15** | 0 | 0.8 | 0.1 | 0 | 0 | 0 | 0 | 0 | 0.1 | 0 |
|  | **0.15** | 0 | 0 | 0.3 | 0.1 | 0.6 | 0 | 0 | 0 | 0 | 0 |
|  | **0.2** | 0 | 0 | 0 | 0.15 | 0.75 | 0 | 0 | 0.1 | 0 | 0 |
|  | **0.2** | 0 | 0 | 0.3 | 0.3 | 0.1 | 0 | 0 | 0.2 | 0.1 | 0 |
|  | **0.3** | 0 | 0 | 0 | 0.15 | 0.75 | 0 | 0 | 0.1 | 0 | 0 |
|  | **0.3** | 0 | 0 | 0 | 0 | 0 | 0 | 0 | 0 | 0 | 1 |
|  | **0.4** | 0 | 0 | 0 | 0 | 0 | 0.2 | 0.8 | 0 | 0 | 0 |
|  | **0.3** | 0 | 0 | 0 | 0 | 0 | 0 | 0.7 | 0 | 0.3 | 0 |
|  | **0.4** | 0 | 0 | 0 | 0.4 | 0.3 | 0 | 0 | 0.1 | 0.2 | 0 |
|  | **0.2** | 0 | 0.8 | 0.1 | 0 | 0 | 0.1 | 0 | 0 | 0 | 0 |
|  | **0.2** | 0 | 0.9 | 0 | 0 | 0 | 0.1 | 0 | 0 | 0 | 0 |
|  | **0.2** | 0 | 0 | 0.3 | 0.1 | 0 | 0 | 0.6 | 0 | 0 | 0 |
|  | **0.3** | 0 | 0.2 | 0.6 | 0.2 | 0 | 0 | 0 | 0 | 0 | 0 |
|  | **0.35** | 0 | 0 | 0 | 0 | 0 | 0 | 0 | 0 | 0 | 1 |
|  | **0.35** | 0 | 0 | 0 | 0 | 0 | 0 | 0 | 0 | 0 | 1 |
|  | **0.2** | 0 | 0 | 0 | 0 | 0 | 0 | 0.2 | 0.3 | 0.5 | 0 |
|  | **0.3** | 0 | 0 | 0.15 | 0.85 | 0 | 0 | 0 | 0 | 0 | 0 |
|  | **0.15** | 0 | 0 | 0.1 | 0.9 | 0 | 0 | 0 | 0 | 0 | 0 |
|  | **0.15** | 0 | 0 | 0.15 | 0.1 | 0 | 0 | 0 | 0.75 | 0 | 0 |
|  | **0.2** | 0 | 0 | 0.3 | 0.3 | 0.1 | 0 | 0 | 0.2 | 0.1 | 0 |
|  | **0.4** | 0.2 | 0.2 | 0.2 | 0.2 | 0 | 0.2 | 0 | 0 | 0 | 0 |
|  | **0.3** | 0 | 0.4 | 0 | 0 | 0.5 | 0.1 | 0 | 0 | 0 | 0 |
|  | **0.3** | 0 | 0.4 | 0.1 | 0 | 0.4 | 0.1 | 0 | 0 | 0 | 0 |
|  | **0.3** | 0 | 0.2 | 0.6 | 0 | 0 | 0.2 | 0 | 0 | 0 | 0 |
|  | **0.2** | 0 | 0 | 0 | 0 | 0 | 0 | 0 | 0 | 0 | 1 |
|  | **0.25** | 0 | 0 | 0 | 0.8 | 0 | 0 | 0.2 | 0 | 0 | 0 |
|  | **0.25** | 0 | 0.5 | 0 | 0 | 0 | 0 | 0 | 0.25 | 0.25 | 0 |
|  | **0.35** | 0 | 0.4 | 0.4 | 0.1 | 0 | 0.1 | 0 | 0 | 0 | 0 |
|  | **0.35** | 0 | 0 | 0.15 | 0.1 | 0 | 0 | 0 | 0.75 | 0 | 0 |
|  | **0.3** | 0.4 | 0.5 | 0 | 0 | 0.1 | 0 | 0 | 0 | 0 | 0 |

**Table A.4.** Information on the evaluation of knowledge structure *ks*2 by expert *e*4

| BD functions | Weights | Probabilities assigned on the subsets of | | | | | | | | | |
| --- | --- | --- | --- | --- | --- | --- | --- | --- | --- | --- | --- |
|  |  |  |  |  |  |  |  |  |  |
|  | **0.2** | 0.2 | 0.5 | 0 | 0 | 0 | 0 | 0.3 | 0 | 0 | 0 |
|  | **0.35** | 0.3 | 0.2 | 0 | 0 | 0.2 | 0 | 0 | 0.3 | 0 | 0 |
|  | **0.2** | 0 | 0.2 | 0.5 | 0.2 | 0 | 0 | 0 | 0 | 0.1 | 0 |
|  | **0.25** | 0 | 0.4 | 0.3 | 0.1 | 0 | 0 | 0 | 0 | 0.2 | 0 |
|  | **0.35** | 0 | 0.3 | 0.4 | 0 | 0 | 0 | 0 | 0 | 0.3 | 0 |
|  | **0.3** | 0.2 | 0.4 | 0.2 | 0 | 0 | 0 | 0 | 0.2 | 0 | 0 |
|  | **0.35** | 0.25 | 0.15 | 0 | 0 | 0 | 0 | 0 | 0.3 | 0.3 | 0 |
|  | **0.1** | 0.1 | 0.3 | 0.1 | 0 | 0.2 | 0 | 0 | 0.3 | 0 | 0 |
|  | **0.3** | 0 | 0 | 0.1 | 0 | 0.5 | 0 | 0 | 0.4 | 0 | 0 |
|  | **0.3** | 0.1 | 0.25 | 0.3 | 0.1 | 0 | 0 | 0 | 0.25 | 0 | 0 |
|  | **0.3** | 0 | 0.15 | 0.3 | 0 | 0 | 0.2 | 0.1 | 0 | 0.25 | 0 |
|  | **0.4** | 0 | 0.15 | 0.3 | 0.1 | 0 | 0 | 0.15 | 0.3 | 0 | 0 |
|  | **0.6** | 0 | 0.15 | 0.35 | 0.4 | 0 | 0 | 0 | 0 | 0.1 | 0 |
|  | **0.25** | 0.15 | 0.3 | 0.25 | 0 | 0 | 0 | 0 | 0 | 0.3 | 0 |
|  | **0.4** | 0 | 0.2 | 0.25 | 0.3 | 0 | 0 | 0 | 0 | 0.25 | 0 |
|  | **0.35** | 0.05 | 0.15 | 0.3 | 0.2 | 0 | 0 | 0 | 0.3 | 0 | 0 |
|  | **0.25** | 0 | 0.15 | 0.4 | 0.2 | 0 | 0 | 0 | 0 | 0.25 | 0 |
|  | **0.25** | 0 | 0.2 | 0.45 | 0.1 | 0 | 0.15 | 0.1 | 0 | 0 | 0 |
|  | **0.3** | 0 | 0.3 | 0.35 | 0 | 0 | 0 | 0 | 0 | 0.35 | 0 |
|  | **0.2** | 0 | 0.2 | 0.5 | 0.3 | 0 | 0 | 0 | 0 | 0 | 0 |
|  | **0.2** | 0 | 0.1 | 0.3 | 0.4 | 0 | 0 | 0 | 0 | 0.2 | 0 |
|  | **0.2** | 0.2 | 0.5 | 0.1 | 0 | 0 | 0 | 0 | 0.2 | 0 | 0 |
|  | **0.3** | 0 | 0.25 | 0.4 | 0.2 | 0 | 0 | 0 | 0 | 0.15 | 0 |
|  | **0.3** | 0.1 | 0.7 | 0.2 | 0 | 0 | 0 | 0 | 0 | 0 | 0 |
|  | **0.4** | 0.7 | 0.3 | 0 | 0 | 0 | 0 | 0 | 0 | 0 | 0 |
|  | **0.3** | 0.2 | 0.3 | 0.4 | 0 | 0 | 0 | 0 | 0.1 | 0 | 0 |
|  | **0.3** | 0.4 | 0.5 | 0.1 | 0 | 0 | 0 | 0 | 0 | 0 | 0 |
|  | **0.15** | 0.2 | 0.6 | 0 | 0 | 0 | 0 | 0 | 0.2 | 0 | 0 |
|  | **0.15** | 0.6 | 0.2 | 0 | 0 | 0 | 0 | 0 | 0.2 | 0 | 0 |
|  | **0.2** | 0 | 0.5 | 0.3 | 0 | 0 | 0 | 0 | 0.2 | 0 | 0 |
|  | **0.2** | 0.6 | 0.3 | 0 | 0 | 0 | 0 | 0 | 0.1 | 0 | 0 |
|  | **0.3** | 0.5 | 0.2 | 0 | 0 | 0.3 | 0 | 0 | 0 | 0 | 0 |
|  | **0.3** | 0 | 0.3 | 0.4 | 0.1 | 0 | 0 | 0 | 0.2 | 0 | 0 |
|  | **0.4** | 0.1 | 0.4 | 0.2 | 0 | 0 | 0.3 | 0 | 0 | 0 | 0 |
|  | **0.3** | 0 | 0.25 | 0.25 | 0 | 0 | 0 | 0 | 0 | 0.5 | 0 |
|  | **0.4** | 0 | 0.2 | 0.5 | 0.3 | 0 | 0 | 0 | 0 | 0 | 0 |
|  | **0.2** | 0 | 0.3 | 0.4 | 0 | 0 | 0 | 0 | 0 | 0.3 | 0 |
|  | **0.2** | 0 | 0 | 0.4 | 0.6 | 0 | 0 | 0 | 0 | 0 | 0 |
|  | **0.2** | 0.2 | 0.6 | 0 | 0 | 0 | 0 | 0 | 0.2 | 0 | 0 |
|  | **0.3** | 0 | 0.2 | 0 | 0 | 0 | 0.2 | 0.3 | 0.3 | 0 | 0 |
|  | **0.35** | 0 | 0.2 | 0.3 | 0.1 | 0 | 0.1 | 0.1 | 0 | 0.2 | 0 |
|  | **0.35** | 0 | 0.2 | 0.5 | 0.3 | 0 | 0 | 0 | 0 | 0 | 0 |
|  | **0.2** | 0 | 0.2 | 0.4 | 0 | 0 | 0.2 | 0 | 0 | 0.2 | 0 |
|  | **0.3** | 0 | 0 | 0.1 | 0.9 | 0 | 0 | 0 | 0 | 0 | 0 |
|  | **0.15** | 0 | 0.1 | 0.5 | 0.2 | 0 | 0 | 0.2 | 0 | 0 | 0 |
|  | **0.15** | 0 | 0.2 | 0.1 | 0 | 0 | 0.2 | 0 | 0.5 | 0 | 0 |
|  | **0.2** | 0 | 0.3 | 0.4 | 0.1 | 0 | 0 | 0 | 0 | 0.2 | 0 |
|  | **0.4** | 0.2 | 0.3 | 0 | 0 | 0.2 | 0 | 0.3 | 0 | 0 | 0 |
|  | **0.3** | 0 | 0 | 0 | 0 | 0 | 0.5 | 0.2 | 0.3 | 0 | 0 |
|  | **0.3** | 0 | 0 | 0 | 0 | 0 | 0.5 | 0.2 | 0.3 | 0 | 0 |
|  | **0.3** | 0 | 0 | 0.3 | 0.7 | 0 | 0 | 0 | 0 | 0 | 0 |
|  | **0.2** | 0 | 0 | 0 | 0 | 0 | 0 | 0 | 0 | 0 | 1 |
|  | **0.25** | 0 | 0.4 | 0.3 | 0 | 0 | 0 | 0 | 0.3 | 0 | 0 |
|  | **0.25** | 0.35 | 0.3 | 0.1 | 0 | 0 | 0 | 0 | 0.25 | 0 | 0 |
|  | **0.35** | 0 | 0.3 | 0.5 | 0 | 0 | 0 | 0.2 | 0 | 0 | 0 |
|  | **0.35** | 0 | 0 | 0.35 | 0.65 | 0 | 0 | 0 | 0 | 0 | 0 |
|  | **0.3** | 0.15 | 0.5 | 0 | 0 | 0 | 0 | 0.15 | 0.2 | 0 | 0 |

**Table A.5.** Information on the evaluation of knowledge structure *ks*3 by expert *e*5

| BD functions | Weights | Probabilities assigned on the subsets of | | | | | | | | | |
| --- | --- | --- | --- | --- | --- | --- | --- | --- | --- | --- | --- |
|  |  |  |  |  |  |  |  |  |  |
|  | **0.3** | 0 | 0.25 | 0.4 | 0.2 | 0 | 0 | 0 | 0 | 0.15 | 0 |
|  | **0.3** | 0.2 | 0.15 | 0.15 | 0 | 0.3 | 0.2 | 0 | 0 | 0 | 0 |
|  | **0.4** | 0.1 | 0.2 | 0.25 | 0.1 | 0 | 0 | 0 | 0.15 | 0.2 | 0 |
|  | **0.4** | 0 | 0.2 | 0.3 | 0.1 | 0 | 0.3 | 0.1 | 0 | 0 | 0 |
|  | **0.3** | 0 | 0.25 | 0.3 | 0.2 | 0 | 0 | 0 | 0 | 0.25 | 0 |
|  | **0.3** | 0 | 0 | 0.4 | 0.6 | 0 | 0 | 0 | 0 | 0 | 0 |
|  | **0.35** | 0.45 | 0.4 | 0 | 0 | 0 | 0 | 0 | 0.15 | 0 | 0 |
|  | **0.35** | 0 | 0.35 | 0.3 | 0.1 | 0 | 0.2 | 0 | 0 | 0.05 | 0 |
|  | **0.3** | 0 | 0.15 | 0.35 | 0.3 | 0 | 0 | 0 | 0 | 0.2 | 0 |
|  | **0.25** | 0.1 | 0.2 | 0.25 | 0.3 | 0 | 0 | 0 | 0 | 0.15 | 0 |
|  | **0.2** | 0 | 0.25 | 0.35 | 0.1 | 0 | 0.2 | 0.1 | 0 | 0 | 0 |
|  | **0.25** | 0.1 | 0.2 | 0.25 | 0.25 | 0 | 0 | 0 | 0 | 0.2 | 0 |
|  | **0.3** | 0.25 | 0.3 | 0.2 | 0 | 0 | 0.1 | 0 | 0.15 | 0 | 0 |
|  | **0.2** | 0 | 0.2 | 0.2 | 0 | 0 | 0.3 | 0 | 0.3 | 0 | 0 |
|  | **0.3** | 0 | 0.4 | 0.5 | 0 | 0 | 0.1 | 0 | 0 | 0 | 0 |
|  | **0.3** | 0 | 0 | 0.1 | 0.35 | 0 | 0 | 0.3 | 0 | 0.25 | 0 |
|  | **0.2** | 0 | 0 | 0 | 0 | 0.4 | 0.3 | 0 | 0.3 | 0 | 0 |
|  | **0.3** | 0 | 0 | 0.3 | 0.7 | 0 | 0 | 0 | 0 | 0 | 0 |
|  | **0.2** | 0.2 | 0.3 | 0 | 0 | 0.2 | 0.3 | 0 | 0 | 0 | 0 |
|  | **0.2** | 0 | 0.4 | 0.4 | 0.2 | 0 | 0 | 0 | 0 | 0 | 0 |
|  | **0.3** | 0.2 | 0.4 | 0 | 0 | 0.3 | 0 | 0 | 0.1 | 0 | 0 |
|  | **0.35** | 0 | 0 | 0.5 | 0.2 | 0 | 0 | 0.3 | 0 | 0 | 0 |
|  | **0.35** | 0 | 0 | 0 | 0.9 | 0 | 0 | 0.1 | 0 | 0 | 0 |
|  | **0.3** | 0 | 0 | 0.3 | 0.7 | 0 | 0 | 0 | 0 | 0 | 0 |
|  | **0.1** | 0.15 | 0.8 | 0.05 | 0 | 0 | 0 | 0 | 0 | 0 | 0 |
|  | **0.2** | 0.5 | 0.2 | 0 | 0 | 0.3 | 0 | 0 | 0 | 0 | 0 |
|  | **0.2** | 0.4 | 0.3 | 0 | 0 | 0.3 | 0 | 0 | 0 | 0 | 0 |
|  | **0.2** | 0.5 | 0.2 | 0 | 0 | 0.3 | 0 | 0 | 0 | 0 | 0 |
|  | **0.3** | 0.65 | 0.35 | 0 | 0 | 0 | 0 | 0 | 0 | 0 | 0 |
|  | **0.15** | 0 | 0.3 | 0.5 | 0 | 0 | 0.2 | 0 | 0 | 0 | 0 |
|  | **0.15** | 0 | 0 | 0 | 0 | 0 | 0 | 0 | 0 | 0 | 1 |
|  | **0.15** | 0 | 0.45 | 0.35 | 0 | 0 | 0.2 | 0 | 0 | 0 | 0 |
|  | **0.15** | 0 | 0.4 | 0.6 | 0 | 0 | 0 | 0 | 0 | 0 | 0 |
|  | **0.1** | 0 | 0.3 | 0.2 | 0 | 0 | 0.5 | 0 | 0 | 0 | 0 |
|  | **0.3** | 0 | 0 | 0 | 0.3 | 0 | 0.2 | 0.2 | 0 | 0.3 | 0 |
|  | **0.35** | 0 | 0 | 0.8 | 0.2 | 0 | 0 | 0 | 0 | 0 | 0 |
|  | **0.35** | 0 | 0 | 0.1 | 0.7 | 0 | 0 | 0.2 | 0 | 0 | 0 |
|  | **0.3** | 0 | 0.5 | 0.2 | 0 | 0 | 0.3 | 0 | 0 | 0 | 0 |
|  | **0.1** | 0 | 0 | 0 | 0 | 0 | 0 | 0 | 0 | 0 | 1 |
|  | **0.1** | 0 | 0 | 0 | 0 | 0 | 0 | 0 | 0 | 0 | 1 |
|  | **0.3** | 0 | 0.2 | 0.3 | 0.5 | 0 | 0 | 0 | 0 | 0 | 0 |
|  | **0.2** | 0 | 0 | 0.3 | 0.4 | 0 | 0 | 0.3 | 0 | 0 | 0 |
|  | **0.1** | 0.4 | 0.3 | 0 | 0 | 0 | 0 | 0 | 0.3 | 0 | 0 |
|  | **0.2** | 0 | 0 | 0 | 0 | 0 | 0.2 | 0.3 | 0.2 | 0.3 | 0 |
|  | **0.3** | 0 | 0.15 | 0.65 | 0.2 | 0 | 0 | 0 | 0 | 0 | 0 |
|  | **0.3** | 0 | 0.6 | 0.2 | 0 | 0 | 0.2 | 0 | 0 | 0 | 0 |
|  | **0.4** | 0 | 0.1 | 0.6 | 0.3 | 0 | 0 | 0 | 0 | 0 | 0 |
|  | **0.2** | 0 | 0 | 0 | 0 | 0 | 0 | 0 | 0 | 0 | 1 |
|  | **0.2** | 0 | 0.2 | 0.4 | 0.1 | 0 | 0 | 0 | 0 | 0.3 | 0 |
|  | **0.35** | 0 | 0 | 0.35 | 0.65 | 0 | 0 | 0 | 0 | 0 | 0 |
|  | **0.25** | 0.3 | 0.5 | 0.2 | 0 | 0 | 0 | 0 | 0 | 0 | 0 |
|  | **0.35** | 0.4 | 0.4 | 0.2 | 0 | 0 | 0 | 0 | 0 | 0 | 0 |
|  | **0.35** | 0 | 0.3 | 0.4 | 0 | 0 | 0 | 0 | 0 | 0.3 | 0 |
|  | **0.3** | 0.45 | 0.35 | 0 | 0 | 0.2 | 0 | 0 | 0 | 0 | 0 |
